# Supplementary material
Source: Springer Nature journal article supplement (https://www.springermedizin.de/resource/supplementary/12943_2009_487_MOESM2_ESM.pdf/9554098)
Supplement: MOESM2 [file 9554098]

# Screening and early detection of colorectal cancer

fecal occult blood test, stool DNA testing

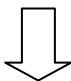

microRNA-based biomarkers in serum

## Patient evaluation

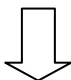

Clinical examination, diagnostic imaging (USG, CT, MRI, PET), colonoscopy

colorectal biopsy specimen

serum

### Molecular staging

(KRAS mutation testing, MSI, EGFR gene copy number, p53 testing...)

### Pathological staging

pTNM, grade, margins of resection, angiolymphatic invasion,...

Tumor markers (CEA, CA19-9)

microRNA-based biomarkers in tissue

microRNA-based biomarkers in serum

Prediction of cancer dissemination, prognosis and chemo/radiotherapy response

Monitoring cancer therapy and progression

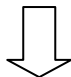

Individualization of therapy and dispenserization for colorectal cancer patients

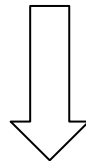

microRNA- based therapy?
